# Supplementary material for: LEA29Y expression in transgenic neonatal porcine islet-like cluster promotes long-lasting xenograft survival in humanized mice without immunosuppressive therapy
Source: PubMed Central journal article supplement (PMC5472587; doi:10.1038/s41598-017-03913-4), 2017-06-15
Supplement: 41598_2017_3913_MOESM1_ESM.pdf [file 41598_2017_3913_MOESM1_ESM.pdf]

# LEA29Y expression in transgenic neonatal porcine islet-like cluster promotes long-lasting xenograft survival in humanized mice without immunosuppressive therapy

L. Wolf-van Buerck, M. Schuster, F.S. Oduncu, A. Baehr, T. Mayr, S. Guethoff, J. Abicht, B. Reichart, N. Klymiuk, E. Wolf, J. Seissler

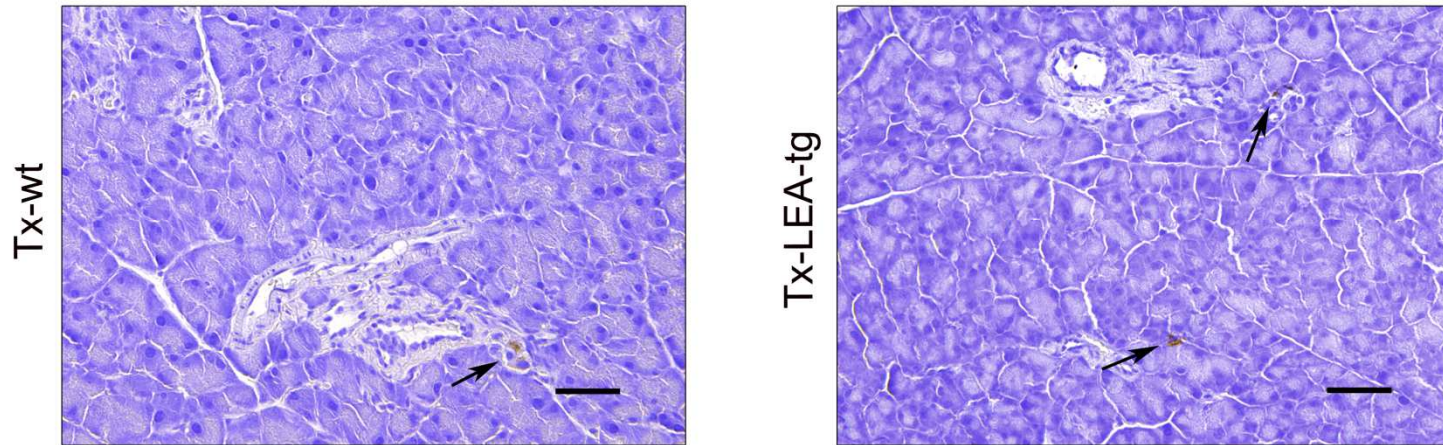

***Supplemental figure 1: Immunohistochemical staining of beta cells in recipient pancreata.***

Immunohistochemical analysis of pancreata from mice transplanted with wild-type (Tx-wt) or *INSLEA29Y* transgenic (Tx-LEA-tg) NPICCs at the end of the study revealed only singular if any insulin<sup>+</sup> (brown) stained beta cells (marked by an arrow) excluding endogenous beta cell regeneration.

Scale bar: 100  $\mu$ m.

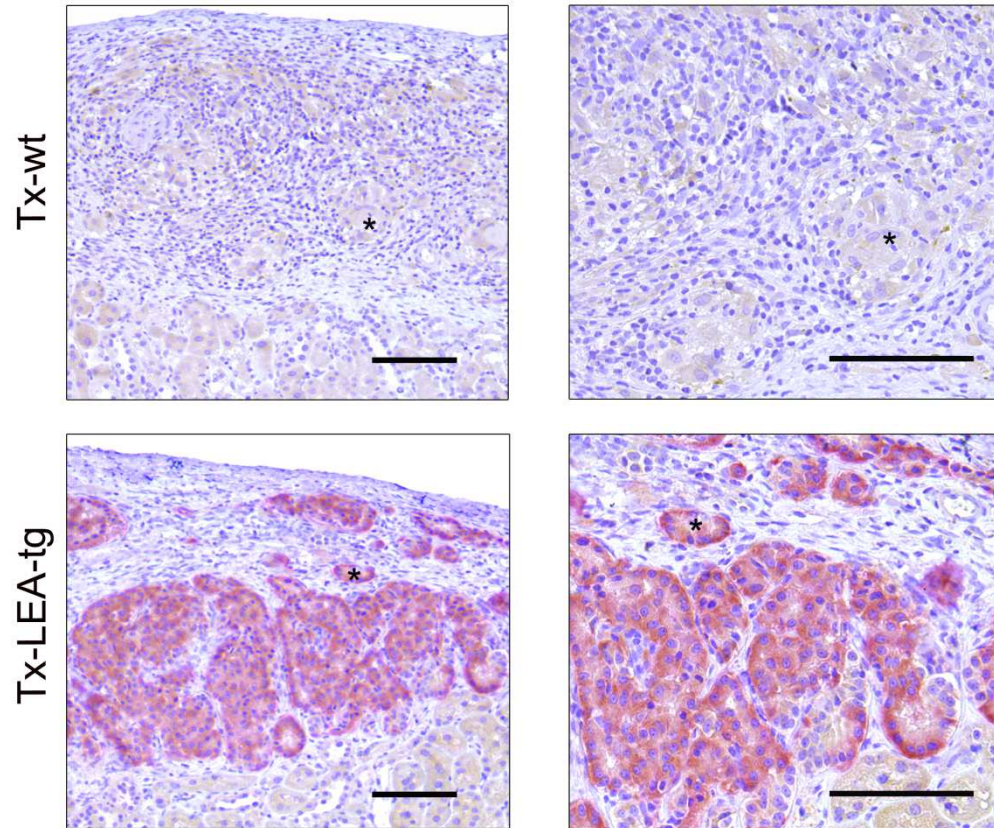

**Supplemental figure 2: CD56<sup>+</sup> NK cells are not detectable in NPICC grafts.**

Immunohistochemical staining of NPICC grafts against the NK cell marker hCD56 (brown) and insulin (red) (left: 100x magnification, right: 200x magnification – identical positions are marked by an asterisk) did not reveal a specific signal for CD56 in grafts of both, mice transplanted with wild-type (Tx-wt) or *INSLEA29Y* transgenic (Tx-LEA-tg) NPICCs.

Scale bar: 100  $\mu$ m.

**A**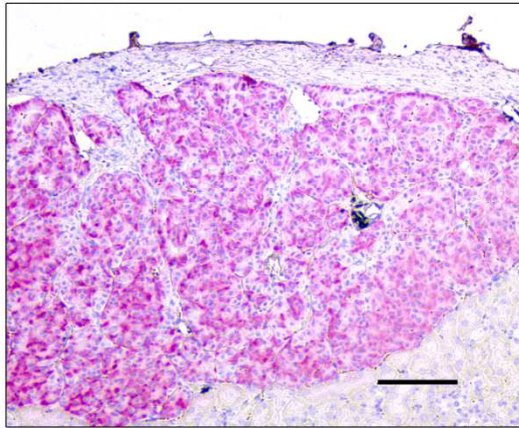**B**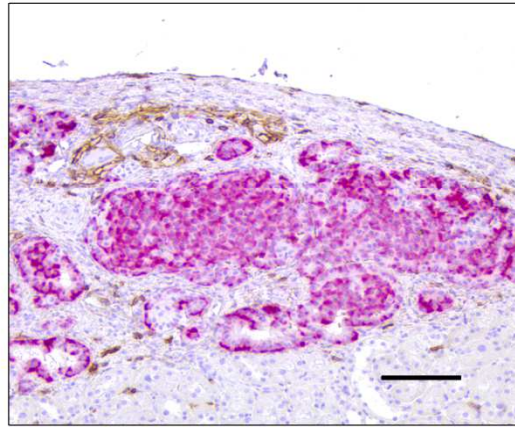**C**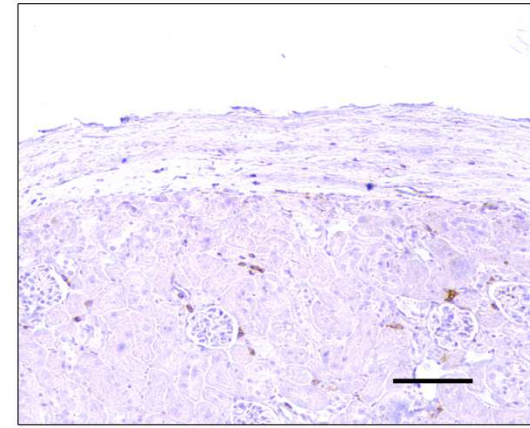

***Supplemental figure 3: Graft morphology in non-normoglycemic mice transplanted with LEA29Y transgenic NPICCs.***

In two mice with LEA29Y transgenic NPICCs that developed almost normal blood glucose levels (A, B), the subcapsular grafts exhibit an intact morphology with widely insulin<sup>+</sup> (red) stained endocrine tissue and only mild infiltration with hCD45<sup>+</sup> lymphocytes (brown). The graft of the single mouse that failed to improve hyperglycemia exhibited few CD45<sup>+</sup> stained cells but no detectable beta cells (C).

Scale bar: 100  $\mu$ m.
